# Supplementary material
Source: MDPI journal article supplement (https://www.mdpi.com/2076-3417/11/21/10492)
Supplement: s1 [file s1]

FM211694.1 *Pseudomonas putida*

CACCCAGTCATGAATCACACCGTGGTAACCGTCCTCCCGAAGGTTAGAC  
TAGCTACTTCTGGTGCAACC  
CACTCCCATGGTGTGACGGGCGGTGTGTACAAGGCCCGGGAACGTATTCA  
CCGCGACATTCTGATTTCGCG  
ATTACTAGCGATTCCGACTTCACGCAGTCGAGTTGCAGACTGCGATCCGG  
ACTACGATCGGTTTTGTGAG  
ATTAGCTCCACCTCGCGGCTTGGCGACCCTCTGTACCGACCATTGTAGCAC  
GTGTGTAGCCCAGGCCGTA  
AGGGCCATGATGACTTGACGTCATCCCCACCTTCCTCCGGTTTTGTCACCGG  
CAGTCTCCTTAGAGTGCCC  
ACCATAACGTGCTGGTAACATAAGGACAAGGGTTGCGCTCGTTACGGGACT  
TAACCCAACATCTCACGACA  
CGAGCTGACGACAGCCATGCAGCACCTGTGTCAGAGTTCCCGAAGGCACC  
AATCCATCTCTGGAAAGTTC  
TCTGCATGTCAAGGCCTGGTAAGGTTCTTCGCGTTGCTTCGAATTAAACCA  
CATGCTCCACCGCTTGTGC  
GGGCCCCCGTCAATTCATTTGAGTTTTAACCTTGCGGCCGTA CTCCCCAGG  
CGGTCAACTTAATGCGTTA  
GCTGCGCCACTAAAATCTCAAGGATTCCAACGGCTAGTTGACATCGTTTA  
CGGCGTGGACTACCAGGGTA  
TCTAATCCTGTTTGCTCCCCACGCTTTCGCACCTCAGTGTCAGTATCAGTC  
CAGGTGGTCGCCTTCGCCA  
CTGGTGTTCCCTTCCTATATCTACGCATTTACCGCTACACAGGAAATTCCA  
CCACCCTCTACTGTACTCT  
AGCTTGCCAGTTTTGGATGCAGTTCCAGGTTGAGCCCCGGGGCTTTCACAT  
CCA ACTTAACAAACCACCT  
ACGCGCGCTTTACGCCAGTAATTCCGATTAACGCTTGCACCCTCTGTATT  
ACCGCGGCTGCTGGCACAG  
AGTTAGCCGGTGCTTATTCTGTGCGTAACGTCAAAACAGCAAGGTATTCTG  
CTTACTGCCCTTCCTCCCAA  
CTTAAAGTGCTTTACAATCCGAAGACCTTCTTCACACACGCGGCATGGCTG  
GATCAGGCTTTCGCCCCATT  
GTCCAATATTCCCCACTGCTGCCTCCCGTAGGAGTCTGGACCGTGTCTCAG  
TTCCAGTGTGACTGATCAT  
CCTCTCAGACCAGTTACGGATCGTCGCCTTGGTGAGCCATTACCTCACCAA  
CTAGCTAATCCGACCTAGG  
CTCATCTGATAGCGCAAGGCCCGAAGGTCCCCTGCTTTCTCCCGTAGGAC  
GTATGCGGTATTAGCGTTCC  
TTTCGAAACGTTGTCCCCCACTATCAGGCAGATTCTTAGGCATTACTCACC  
CGTCCGCCGCTGAATCGAA  
GAGCAAGCTCTTCTCATCCGCTCGACTTG CATGTGTTAGCCTG

AB084065 *Bacillus* sp.

AF282889.1 *Nocardia cyriacigeorgici* 16S ribosomal RNA gene,

TTTCATGACGTGACGGGCGGTGTGTACAAGGCCCGGGAACGTATTCACCG  
CAGCGTTGCTGATCTGCGAT  
ACTAGCGACTCCAACTTCACGGGGTCGAGTTGCAGACCCCGATCCGAACT  
GAGACCGGCTTTAAGGGATT  
CGCTCCACCTCACGGTATCGCAGCCCTCTGTACCGGCCATTGTAGCATGTG  
TGAAGCCCTGGACATAAGG  
GGCATGATGACTTGACGTCTGTCACCTTCCTCCGAGTTGACCCCGGCAG  
TCTCTCACGAGTCCCGCC  
ATTACGCGCTGGCAACATAAGATAAGGGTTGCGCTCGTTGCGGGACTTAA  
CCCAACATCTCACGACACGA  
GCTGACGACAGCCATGCACCACCTGTACACCGACCACAAGGGGGCCTACA  
TCTCTGCAGGTTTCCGGTGT  
ATGTCAAACCCAGGTAAGGTTCTTCGCGTTGCATCGAATTAATCCACATGC  
TCCGCCGCTTGTGCGGGCC  
CCCGTCAATTCCTTTGAGTTTTAGCCTTGCGGCCGTACTCCCCAGGCGGGG  
TACTTAATGCGTTAGCTAC  
GGCACGGATCCCGTGGAAGGAAACCCACACCTAGTACCCACCGTTTACGG  
CGTGGACTACCAGGGTATCT  
AATCCTGTTGCTACCCACGCTTTCGCTTCTCAGCGTCAGTTACTTCCCAG  
AGACCCGCCTTCGCCACCG  
GTGTTCTCCTGATATCTGCGCATTTACCGCTACACCAGGAATTCCAGTC  
TCCCCTGAAGTACTCAAGC  
CTGCCCCGTATCGACCGCAAGCTTGGGGTTGAGCCCCAAGTTTTACGATC  
GACGCGACAAGCCGCCTACA  
AGCTCTTTACGCCAGTAATTCGGGACAACGCTCGCACCCCTACGTATTACC  
GCGGCTGCTGGCACGTAGT  
TGGCCGGTGCTTCTTCTACAGGTACCGTCACTTGCGCTTCGTCCCTGTCGA  
AAGAGGTTTACAACCCGAA  
GGCCGTCATCCCTCACGCGGCGTCGCTGCATCAGGCTTTCGCCCATTGTGC  
AATATTCCCCACTGCTGCC  
TCCCGTAGGAGTCTGGGGCGTGTCTCAGTCCCAGTGTGGCCGGTCGCCCTC  
TCAGGCCGGCTACCCGTCG  
TCGCCTTGGTAGGCCATTACCCACCAACAAGCTGATAGGCCGCGGGCCC  
ATCTCGCACCGATAAATCTT  
TCCACCAAACACCATGCGATGTAAGGTCATATCCGGTATTAGACCCAGTT  
TCCCAGGCTTATCCCAGAGT  
GCGAGGCAGATACCCACGTGTTACTCACCCGTTCCGCCGCTCGTGTACCCC  
GAAGGGCCTTACCGCTCGA  
CTTGCATGTGTTAAGCACGCCGCCAGCGTCGTCCT

\

0.02

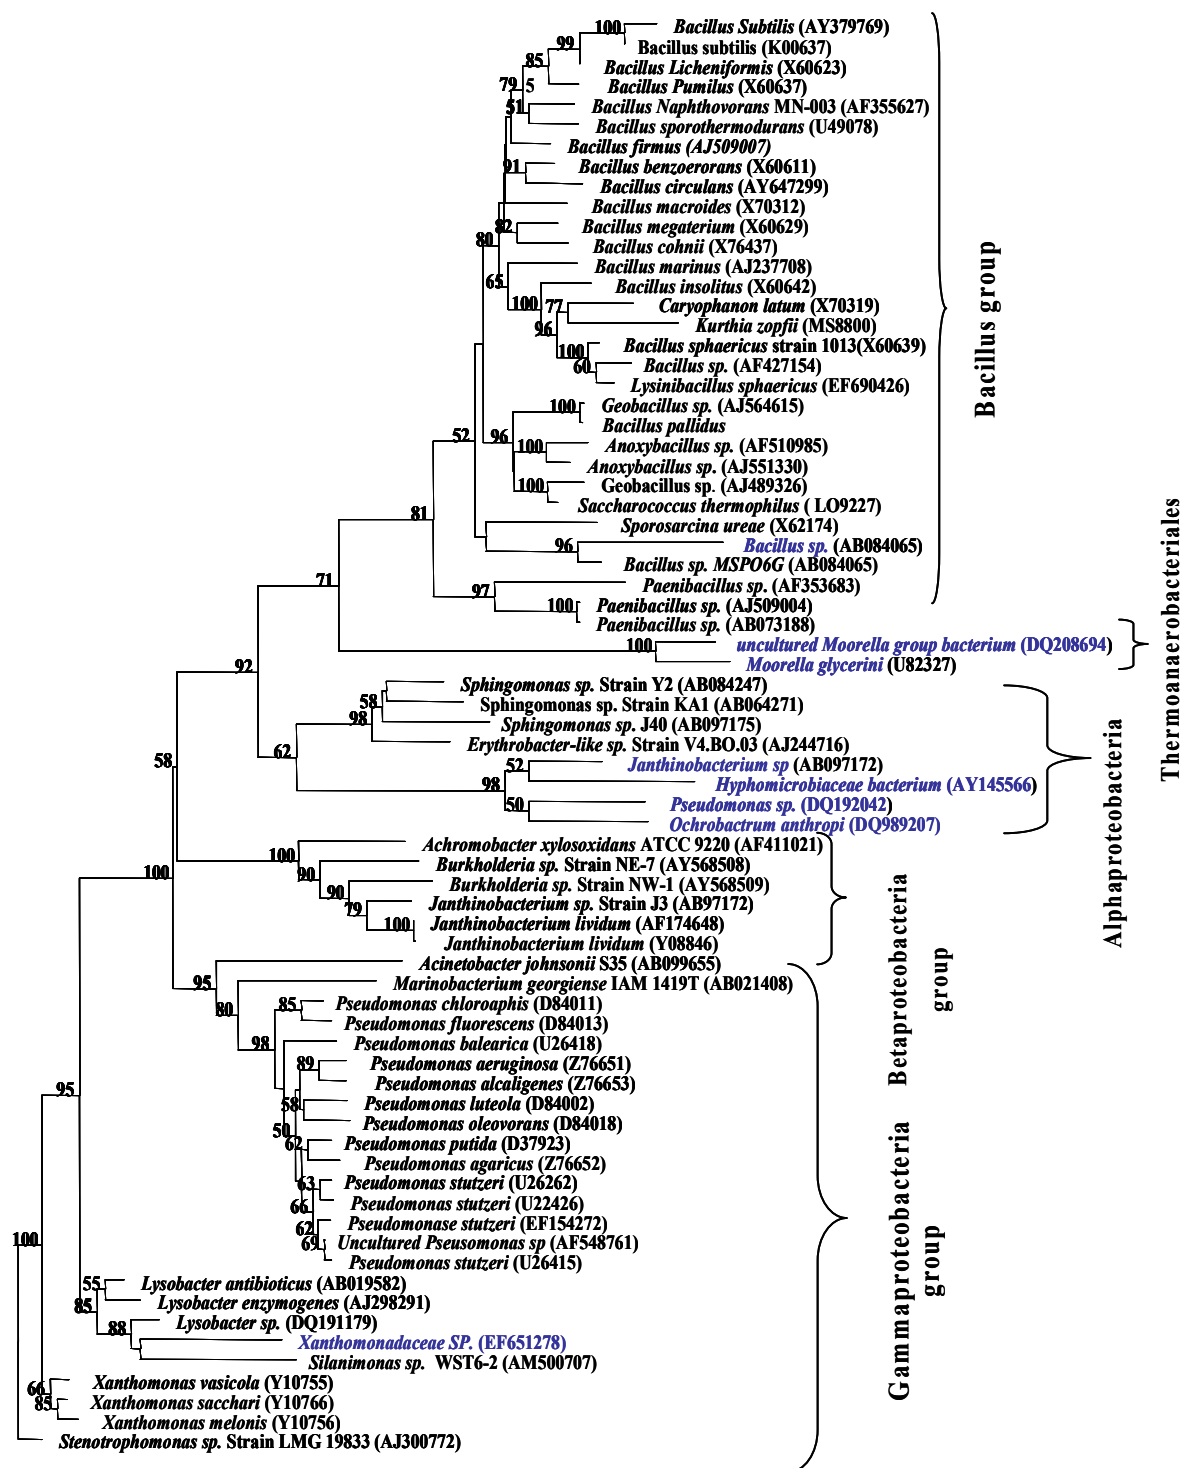

Neighbour-joining tree based on nearly complete 16S rRNA gene obtained from PCR-DGGE analysis.
